# Supplementary material
Source: ML conference proceedings conference paper supplement (https://openreview.net/forum?id=GMyOgIE0ce)
Supplement: supplementary_material [file attachment]

# Appendix

## A IDM

Here, we introduce the first diffusion auction for selling single item, IDM [13]. A key concept of IDM is diffusion critical sequence. Given a profile digraph  $G_{\theta'}$ , for any buyers  $i, j \in V_{\theta'}$ ,  $i$  is  $\theta'$ -critical to  $j$ , denoted by  $i \preceq_{\theta'} j$ , if all paths from  $s$  to  $j$  in  $G_{\theta'}$  go through  $i$ . A *diffusion critical sequence* of  $i$ , denoted by  $C_i$ , is a sequence of all diffusion critical nodes of  $i$  and  $i$  itself ordered by  $\theta'$ -critical relation. That is,  $C_i = (x_1, x_2, \dots, x_k, i)$ , where  $x_1 \preceq_{\theta'} x_2 \preceq_{\theta'} \dots \preceq_{\theta'} x_k \preceq_{\theta'} i$ . Based on this concept, IDM works as follows. IDM first locates the buyer  $m$  with the highest valuation among all buyers. Then it allocates the item to the buyer  $w$ , who has the highest valuation when the buyers after  $w$  are not considered. The winner  $w$  pays the highest bid without her participation, and each diffusion critical node is rewarded by the increased payment due to her participation.

## B PROOF OF LEMMA 4.6

**Lemma 4.6.** *Given a reported global profile  $\theta'$ , recursive DPDM REC is  $\epsilon d_{\max} \Delta \sigma$ -differentially private, where  $\epsilon$  is the DP parameter of REC.*

*Proof.* Let  $\theta$  and  $\theta'$  be two profiles where a buyer  $i$ 's reports  $v_i$  in  $\theta$  and  $v'_i$  in  $\theta'$  such that  $v_i \neq v'_i$ . Consider the probabilities that REC( $\theta$ ) and REC( $\theta'$ ) return a winner  $w$ . In a critical diffusion tree  $T_{\theta}$ , let  $d_w$  denote the depth of  $w$ ,  $a_w^\ell$  be an ancestor of  $w$  with distance  $\ell$ . Also, let  $\text{Exp}^\theta(T(a_w^1) - T(w))$  and  $\text{Exp}^{\theta'}(T(a_w^1) - T(w))$  denote the value derived from  $\theta$  and  $\theta'$ , respectively. Then by Equation (8), we have

$$\frac{\Pr[\text{REC}(\theta) = o_w]}{\Pr[\text{REC}(\theta') = o_w]} = \frac{\frac{\text{Exp}(w)}{\text{Exp}^\theta(T(a_w^1) - T(w))}}{\frac{\text{Exp}^{\theta'}(w)}{\text{Exp}^{\theta'}(T(a_w^1) - T(w))}} \times \frac{\Pr_{T[a_w^1]}^\theta - \Pr_{a_w^1}^\theta}{\Pr_{T[a_w^1]}^{\theta'} - \Pr_{a_w^1}^{\theta'}}$$

We repeatedly replace  $\Pr_{T[a_w^1]}^\theta$ ,  $\Pr_{a_w^1}^\theta$ ,  $\Pr_{T[a_w^1]}^{\theta'}$ ,  $\Pr_{a_w^1}^{\theta'}$  by expressions of  $a_w^{\ell+1}$  until we get an expression of  $s$ . For each distance  $0 \leq \ell < d_w$ , we denote  $\frac{\text{Exp}(T(a_w^\ell))}{\text{Exp}(T(a_w^{\ell+1}))}$  as  $A_\ell^\theta$ ,  $\frac{\text{Exp}(a_w^\ell)}{\text{Exp}(T(a_w^{\ell+1}) \setminus T(a_w^\ell))}$  as  $B_\ell^\theta$ . For  $\theta'$ , we have similar notations as  $A_\ell^{\theta'}$  and  $B_\ell^{\theta'}$ . Then the above ratio can be written as

$$\frac{\Pr[\text{REC}(\theta) = o_w]}{\Pr[\text{REC}(\theta') = o_w]} = \frac{B_0^\theta}{B_0^{\theta'}} \times \prod_{\ell=1}^{d_w-1} \frac{A_\ell^\theta - B_\ell^\theta}{A_\ell^{\theta'} - B_\ell^{\theta'}}$$

Next we show for each  $0 \leq \ell < d_w$ ,  $\frac{A_\ell^\theta - B_\ell^\theta}{A_\ell^{\theta'} - B_\ell^{\theta'}}$  is bounded by  $\exp(\epsilon \Delta \sigma)$ . To prove it, we first show for each  $\ell$ ,  $(A_\ell^\theta - A_\ell^{\theta'}) \times (B_\ell^\theta - B_\ell^{\theta'}) \geq 0$  by cases.

- (1) When  $i \in T[a_w^\ell]$ , we have  $A_\ell^\theta - A_\ell^{\theta'} \leq 0$ ,  $B_\ell^\theta - B_\ell^{\theta'} \leq 0$  or  $A_\ell^\theta - A_\ell^{\theta'} \geq 0$ ,  $B_\ell^\theta - B_\ell^{\theta'} \geq 0$
- (2) When  $i \in T[a_w^{\ell+1}] \setminus T[a_w^\ell]$ , then  $A_\ell^\theta - A_\ell^{\theta'} \leq 0$ ,  $B_\ell^\theta - B_\ell^{\theta'} \leq 0$  or  $A_\ell^\theta - A_\ell^{\theta'} \geq 0$ ,  $B_\ell^\theta - B_\ell^{\theta'} \geq 0$
- (3) When  $i \notin T[a_w^{\ell+1}]$ , then  $A_\ell^\theta - A_\ell^{\theta'} = 0$ ,  $B_\ell^\theta - B_\ell^{\theta'} = 0$ .

Without loss of generality, we assume that  $A_\ell^{\theta'} = \alpha_1 A_\ell^\theta$ ,  $B_\ell^{\theta'} = \alpha_2 B_\ell^\theta$ ,  $\alpha_1, \alpha_2 \in \mathbb{R}^+$ . Plug in these two equations, and we get

$$\frac{A_\ell^\theta - B_\ell^\theta}{A_\ell^{\theta'} - B_\ell^{\theta'}} = \frac{A_\ell^\theta - B_\ell^\theta}{\alpha_1 A_\ell^\theta - \alpha_2 B_\ell^\theta}.$$

Then we consider two cases:

- (1) When  $\alpha_1 \geq \alpha_2$ , we have  $\frac{A_\ell^\theta - B_\ell^\theta}{\alpha_1 A_\ell^\theta - \alpha_2 B_\ell^\theta} \leq \frac{A_\ell^\theta - B_\ell^\theta}{\alpha_1 A_\ell^\theta - \alpha_1 B_\ell^\theta} \leq \frac{1}{\alpha_1}$ .
- (2) When  $\alpha_2 \geq \alpha_1$ , we have  $\frac{A_\ell^\theta - B_\ell^\theta}{\alpha_1 A_\ell^\theta - \alpha_2 B_\ell^\theta} \leq \frac{A_\ell^\theta - B_\ell^\theta}{\alpha_2 A_\ell^\theta - \alpha_2 B_\ell^\theta} \leq \frac{1}{\alpha_2}$ .

After that, we show that both  $\frac{1}{\alpha_1}$  and  $\frac{1}{\alpha_2}$  are bounded by  $\exp(\epsilon \Delta \sigma)$  as follows. By definition of  $\alpha_1$ , we have  $\frac{1}{\alpha_1} =$

$$\frac{A_\ell^\theta}{A_\ell^{\theta'}} = \frac{\text{Exp}^\theta(T[a_w^\ell])}{\text{Exp}^{\theta'}(T[a_w^\ell])} \times \frac{\text{Exp}^{\theta'}(T(a_w^{\ell+1}))}{\text{Exp}^\theta(T(a_w^{\ell+1}))}.$$

- (1) When valuation  $v'_i \leq v_i$ , the second ratio is at most 1. Then we have

$$\begin{aligned} \frac{1}{\alpha_1} &= \frac{A_\ell^\theta}{A_\ell^{\theta'}} \leq \frac{\text{Exp}^\theta(T[a_w^\ell])}{\text{Exp}^{\theta'}(T[a_w^\ell])} \\ &\leq \frac{\sum_{k \in T[a_w^\ell]} \exp(\epsilon \sigma(\theta, o_k))}{\sum_{k \in T[a_w^\ell]} \exp(\epsilon(\sigma(\theta, o_k) - \Delta \sigma))} \leq \exp(\epsilon \Delta \sigma) \end{aligned}$$

- (2) When valuation  $v'_i \geq v_i$ , the first ratio is at most 1. We have

$$\begin{aligned} \frac{1}{\alpha_1} &= \frac{A_\ell^\theta}{A_\ell^{\theta'}} \leq \frac{\text{Exp}^{\theta'}(T(a_w^{\ell+1}))}{\text{Exp}^\theta(T(a_w^{\ell+1}))} \\ &\leq \frac{\sum_{k \in T(a_w^{\ell+1})} \exp(\epsilon(\sigma(\theta, o_k) + \Delta \sigma))}{\sum_{k \in T(a_w^{\ell+1})} \exp(\epsilon \sigma(\theta, o_k))} \leq \exp(\epsilon \Delta \sigma) \end{aligned}$$

In a similar way, we can show that  $\frac{1}{\alpha_2} \leq \exp(\epsilon \Delta \sigma)$ .

Therefore we have

$$\begin{aligned} \frac{\Pr[\text{REC}(\theta) = o_w]}{\Pr[\text{REC}(\theta') = o_w]} &\leq \exp(\epsilon \Delta \sigma) \times \prod_{1 \leq \ell < d_w} \exp(\epsilon \Delta \sigma) \\ &\leq \exp(\epsilon d_w \Delta \sigma) \leq \exp(\epsilon d_{\max} \Delta \sigma) \end{aligned}$$

□

## C PROOF OF LEMMA 5.2

**Lemma 5.2.** *Given a reported global profile  $\theta'$ , layered DPDM LAY is  $\epsilon\Delta\sigma$ -differential private, where  $\epsilon$  is the privacy parameter of LAY.*

*Proof.* Given a global profile  $\theta$ , for each buyer  $i$  with  $(v_i, r_i)$ , we have

$$\begin{aligned}\mathbf{E}_{\text{LAY}}[u_i(\theta)] &= (v_i - p_i(\theta))\Pr_i(\theta_i) \\ &= \int_0^{v_i} \Pr_i^{\text{LAY}}((x, r_i))dx \geq 0.\end{aligned}$$

Therefore, the lemma holds.  $\square$

## D PROOF OF LEMMA 5.4

**Lemma 5.4.** *Given a reported global profile  $\theta'$ , layered DPDM LAY is  $\epsilon\Delta\sigma$ -differential private, where  $\epsilon$  is the privacy parameter of LAY.*

*Proof.* Given two reported global profiles  $\theta$  and  $\theta'$  that differ in an arbitrary buyer  $i$ 's reported valuation such that  $i$  reports  $v_i$  in  $\theta$  and  $v'_i$  in  $\theta'$ , we consider the probabilities that LAY( $\theta$ ) and LAY( $\theta'$ ) return a winner  $w$ .

Without loss of generality, we assume that  $w$  is in  $L_\ell$ , then we have

$$\begin{aligned}\frac{\Pr[\text{LAY}(\theta) = o_w]}{\Pr[\text{LAY}(\theta') = o_w]} &= \frac{\Pr_{L_\ell} \times \frac{\text{Exp}^\theta(w)}{\text{Exp}^\theta(L_\ell)}}{\Pr_{L_\ell} \times \frac{\text{Exp}^{\theta'}(w)}{\text{Exp}^{\theta'}(L_\ell)}} \\ &= \frac{\text{Exp}^\theta(w)}{\text{Exp}^{\theta'}(w)} \frac{\text{Exp}^{\theta'}(L_\ell)}{\text{Exp}^\theta(L_\ell)}\end{aligned}$$

When  $i$  is not on layer  $L_\ell$ ,  $\frac{\Pr[\text{LAY}(\theta)=o_w]}{\Pr[\text{LAY}(\theta')=o_w]} = 1 \leq \exp(\epsilon\Delta\sigma)$ . Otherwise, when  $i$  is on layer  $L_\ell$ , we consider two cases.

(1)  $v_i < v'_i$ . As  $\sigma(\cdot)$  is non-decreasing in  $v_i$ , the first ratio is at most 1. Then we have

$$\begin{aligned}\frac{\Pr[\text{LAY}(\theta) = o_w]}{\Pr[\text{LAY}(\theta') = o_w]} &\leq \frac{\text{Exp}^{\theta'}(L_\ell)}{\text{Exp}^\theta(L_\ell)} \\ &\leq \frac{\sum_{j \in L_\ell} \exp(\epsilon(\sigma(\theta, o_j) + \Delta\sigma))}{\sum_{j \in L_\ell} \exp(\epsilon\sigma(\theta, o_j))} \\ &\leq \exp(\epsilon\Delta\sigma)\end{aligned}$$

(2)  $v_i > v'_i$ . In this case, the second ratio is at most 1. Then we have

$$\begin{aligned}\frac{\Pr[\text{LAY}(\theta) = o_w]}{\Pr[\text{LAY}(\theta') = o_w]} &\leq \frac{\text{Exp}^\theta(w)}{\text{Exp}^{\theta'}(w)} \leq \frac{\exp(\epsilon\sigma(\theta, o_w))}{\exp(\epsilon(\sigma(\theta, o_w) - \Delta\sigma))} \\ &\leq \exp(\epsilon\Delta\sigma)\end{aligned}$$

$\square$

## E PROOF OF THEOREM 5.6

**Theorem 5.6** *Given a global profile  $\theta$ , layered DPDM LAY has  $\mathbf{E}_{\text{LAY}}[sw_{\text{LAY}}(\theta)] \geq \gamma_{d_{\max}} \mathbf{E}_{\text{EMD}}[sw_{\text{EMD}}(\theta)]$ .*

*Proof.* Given a global profile  $\theta$ , the expected social welfare of LAY is

$$\begin{aligned}\mathbf{E}_{\text{LAY}}[sw_{\text{LAY}}(\theta)] &= \sum_{i \in V} (v_i \times \Pr_i^{\text{LAY}}(\theta_i)) \\ &= \sum_{i \in V} v_i \frac{\exp(\epsilon, \sigma(\theta, o_i))}{\sum_{j \in L_{d_i}} \frac{1}{\gamma_{d_i}} \exp(\epsilon, \sigma(\theta, o_j))} \\ &\geq \gamma_{d_{\max}} \sum_{i \in N} v_i \frac{\exp(\epsilon, \sigma(\theta, o_i))}{\sum_{j \in L_{d_i}} \exp(\epsilon, \sigma(\theta, o_j))} \\ &\geq \gamma_{d_{\max}} \sum_{i \in N} v_i \frac{\exp(\epsilon, \sigma(\theta, o_i))}{\sum_{j \in V} \exp(\epsilon, \sigma(\theta, o_j))} \\ &= \gamma_{d_{\max}} \mathbf{E}_{\text{LAY}}[sw_{\text{LAY}}(\theta)]\end{aligned}$$

$\square$
